# Supplementary material
Source: PubMed Central journal article supplement (PMC3059032)

**Fig. 1S.** Adhesion and migration of HSCs required interaction with and signaling through integrins and HSPGs. **A**, cell lysates from untreated and rCCN1-treated HSCs were analyzed by Western blotting with antibodies against phospho (P)-Erk1/2, P-JNK1/2, Pyk2 and GAPDH. **B**, rCCN1-induced cell adhesion is dependent on signaling through integrins and HSPGs. Cells were preincubated with either Pd-098059 (10  $\mu$ M), SP-600125 (10  $\mu$ M), EDTA (10 mM) with or without Mg<sup>++</sup>(20 mM), or heparin (0.1  $\mu$ g/ml) for 30 min before being plated on rCCN1-coated wells. \*\*, p<0.01 vs rCCN1-treated HSCs. Values are means of triplicate measurements. **C**, rCCN1-induced cell migration required signaling through integrins. Cell migration was examined upon treatment with the indicated inhibitors. Inhibitors were added to both compartments of the transwell and cell migration was determined as described under "Experimental Procedures". \*\*, p<0.01 vs rCCN1-treated HSCs. **D**, effects of rCCN1 on integrin subunit expression. The mRNA levels of  $\alpha_1$ ,  $\alpha_2$ ,  $\alpha_4$ ,  $\alpha_5$ ,  $\alpha_{v}$ ,  $\alpha_{H}$ ,  $\beta_1$ ,  $\beta_3$  and  $\beta_5$  integrin subunits was determined by real-time PCR. Normalized Ct values were the means of three replicates from two experiments. \* and \*\*, p<0.05 and p<0.01 vs BSA-treated HSCs. **E**, Effects of neutralizing antibodies of integrin subunits on rCCN1-induced cell adhesion. Cells were incubated with 25  $\mu$ g/ml of the indicated antibodies for 1 hr before being plated in rCCN1-coated wells. \* and \*\*, p<0.05 and p<0.01 vs rCCN1-treated HSCs. **F**, Effects of neutralizing antibodies of integrin subunits on rCCN1-induced cell migration. Cells were preincubated with 25  $\mu$ g/ml of the indicated antibodies before being added to the Transwell compartment. Data shown are means of triplicate measurements and are representative of two experiments. \*\*, p<0.05 vs rCCN1-treated HSCs.

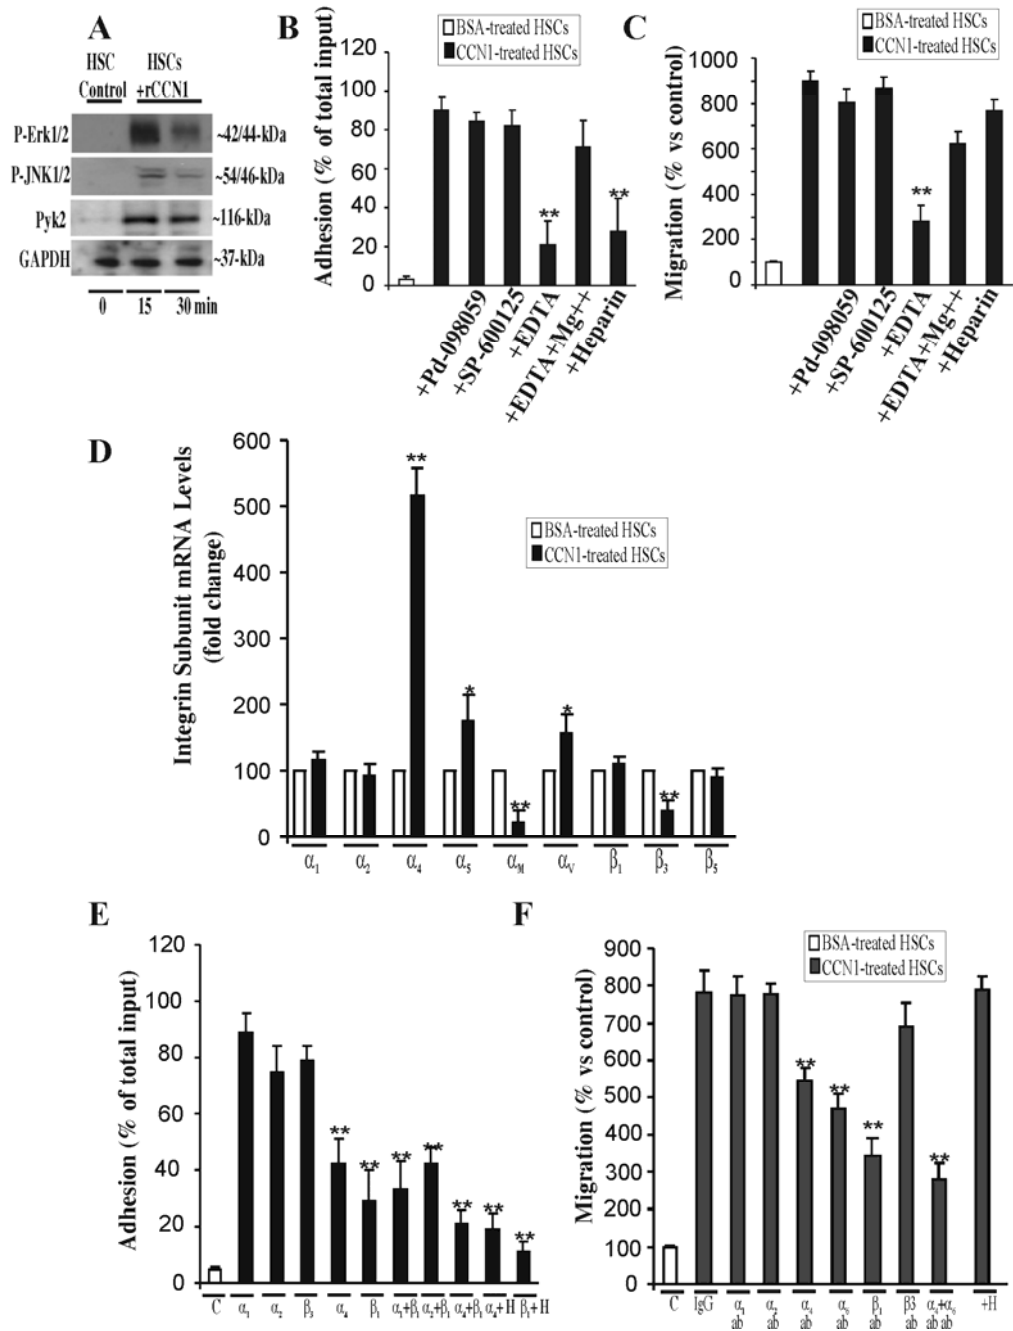

Supplement: supp_M110.198689_jbc.M110.198689-1.pdf [file supp_M110.198689_jbc.M110.198689-1.pdf]
